# Supplementary material for: Control of CRK-RAC1 activity by the miR-1/206/133 miRNA family is essential for neuromuscular junction function
Source: PubMed Central journal article supplement (PMC9178026; doi:10.1038/s41467-022-30778-7), 2022-06-08
Supplement: 41467_2022_30778_MOESM3_ESM.pdf [file 41467_2022_30778_MOESM3_ESM.pdf]

## **Description of Additional Supplementary Information File**

**Supplementary Data 1:** LC-MS/MS Parametrization. Description of all LC-MS/MS parameters, chromatography gradients and the parametrization of the MaxQuant suite of algorithms.
